# Supplementary material for: A highly selective solution and film based sensor for colorimetric sensing of arginine in aqueous and blood samples
Source: Royal Society of Chemistry journal article supplement (doi:10.1039/d4ay01434k), 2024-01-01
Supplement: d4ay01434k1.pdf [file d4ay01434k1.pdf]

## Supplementary Information:

Highly selective solution and film based sensor for colorimetric sensing of arginine in aqueous and biological samples.

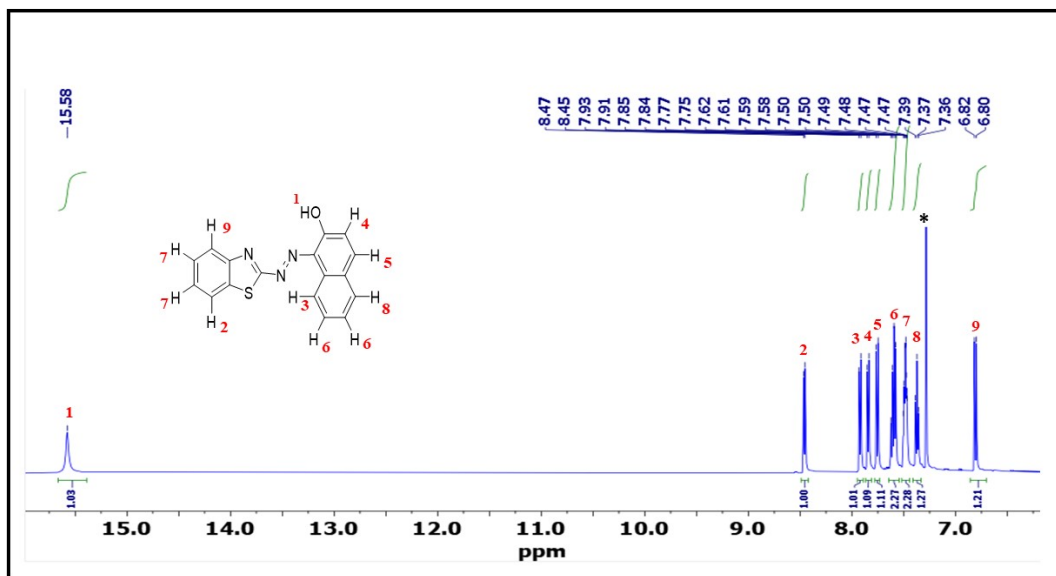

Figure S1: <sup>1</sup>H-NMR of BTAN

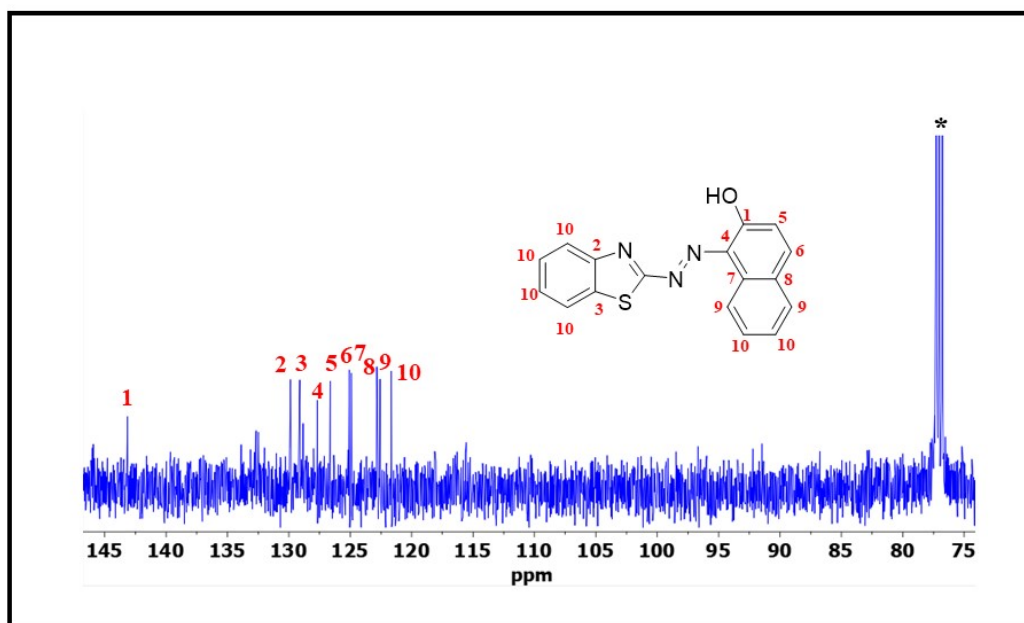

Figure S2: <sup>13</sup>C-NMR of BTAN

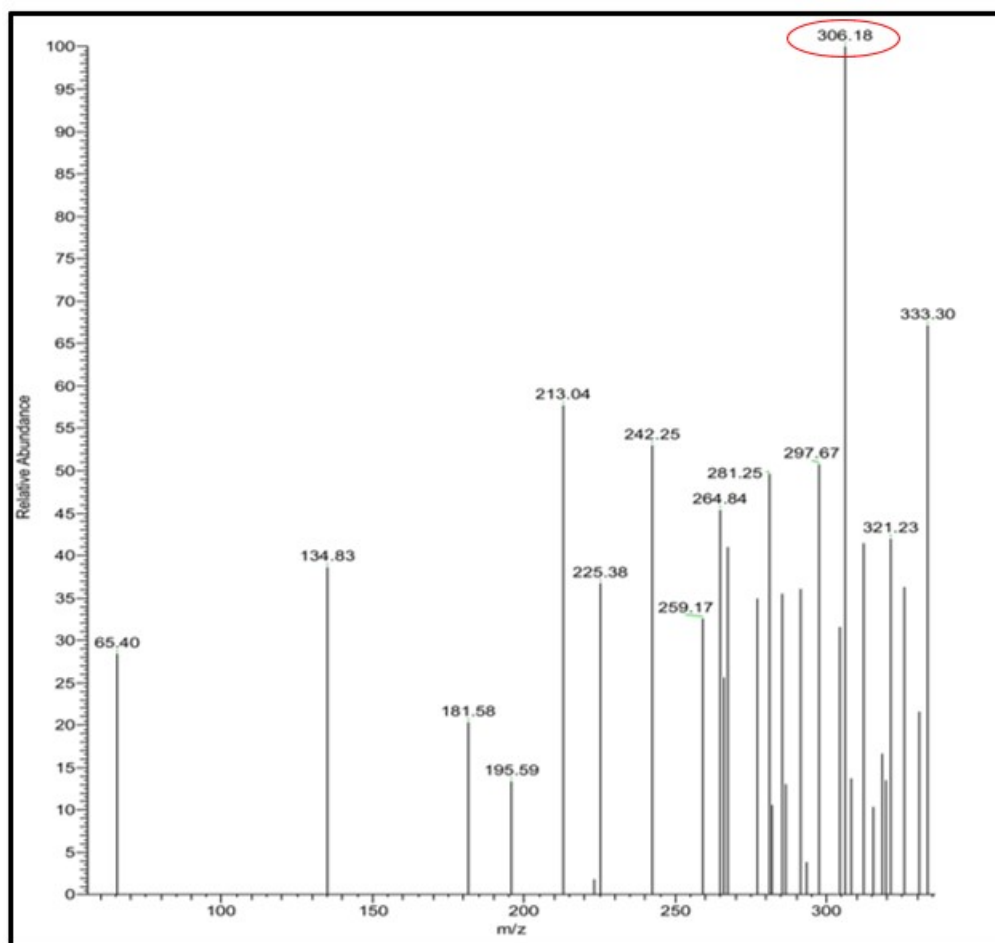

Figure S3: LC-MS spectra of BTAN showing  $[M+H^+]$  peak

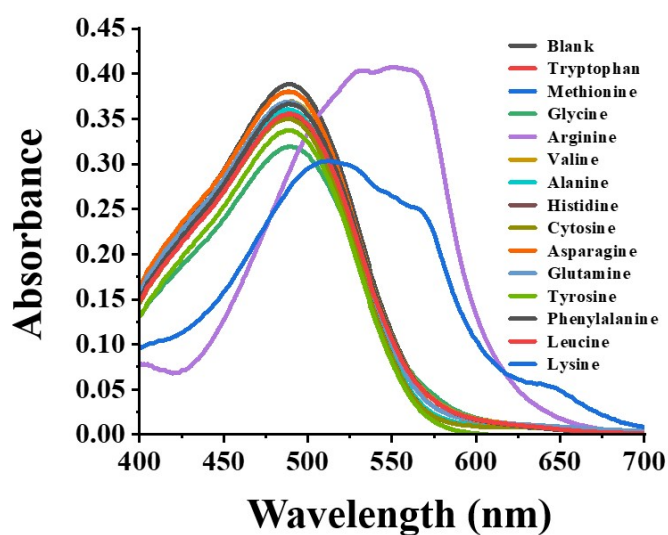

Figure S4: Spectral changes of BTAN upon addition of 1 equiv. of different amino acids.

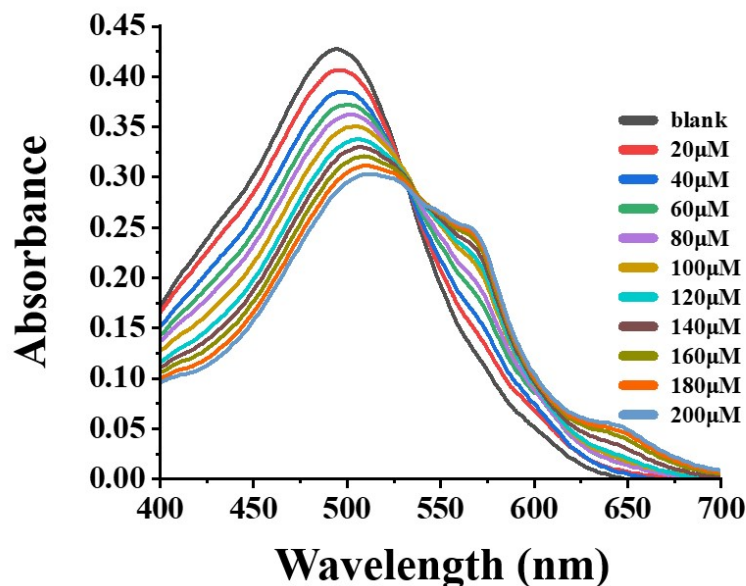

**Figure S5:** Overlaid absorption spectra of BTAN ( $10^{-5}$  M) on aliquot addition of lysine ( $10^{-4}$  M) in DMSO-H<sub>2</sub>O, (1:1, v/v).

#### Determination of Binding Constant

The binding constant of BTAN for arginine (Arg) was determined using Benesi-Hildebrand equation. To achieve this, a graph was plotted with the inverse of arginine concentration on the x-axis and the inverse of the change in the absorbance on the y-axis ( $1/\Delta A$  vs.  $1/[\text{Arg}]$ ). The equation used for this calculation is given as follows:

$$(1/\Delta A = 1/\{K_a(A_0 - A_{\max}) [\text{Arg}]\} + 1/(A_0 - A_{\max}))$$

When plotting  $1/\Delta A$  vs.  $1/[\text{Arg}]$ , a linear graph is obtained. The binding constant,  $K_a$ , can be determined by Intercept/Slope obtained from the plot.

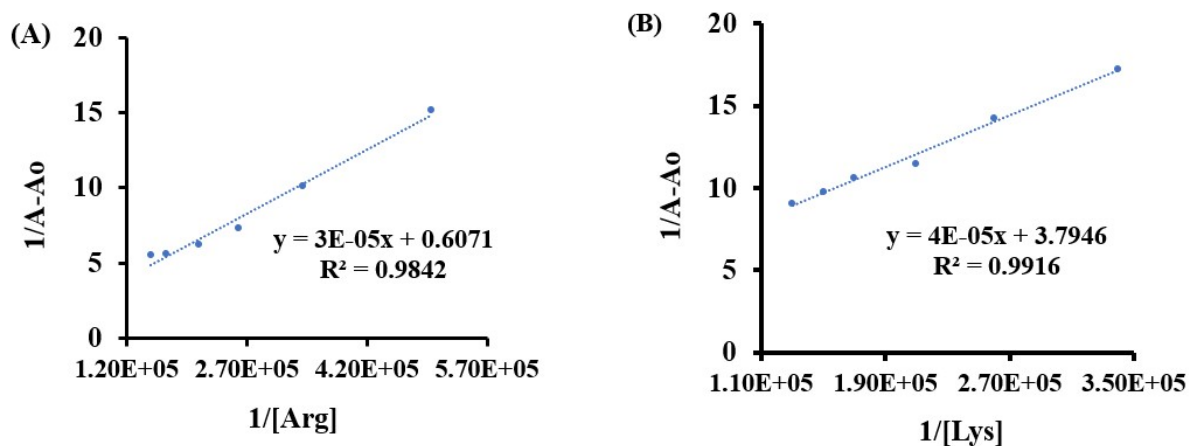

**Figure S6:** Binding constant plot of BTAN for (A) arginine at 530 nm (B) lysine at 567 nm

### Determination of limit of detection (LOD):

The detection limit for the arg detection was evaluated using the following formula:

Detection Limit =  $3\sigma/K$ , where  $\sigma$  is the standard deviation of blank measurement, and K is the slope between the absorbance of host vs guest concentration.

$$\sigma = 0.000816$$

$$\text{LOD for arginine} = (3 \times 0.000816 / 0.0317) \times 10^{-5} \text{M} = 0.7 \times 10^{-6} \text{M} = 0.7 \mu\text{M}$$

$$\text{LOD for lysine} = (3 \times 0.000816 / 0.0184) \times 10^{-5} \text{M} = 1.3 \times 10^{-6} \text{M} = 1.3 \mu\text{M}$$

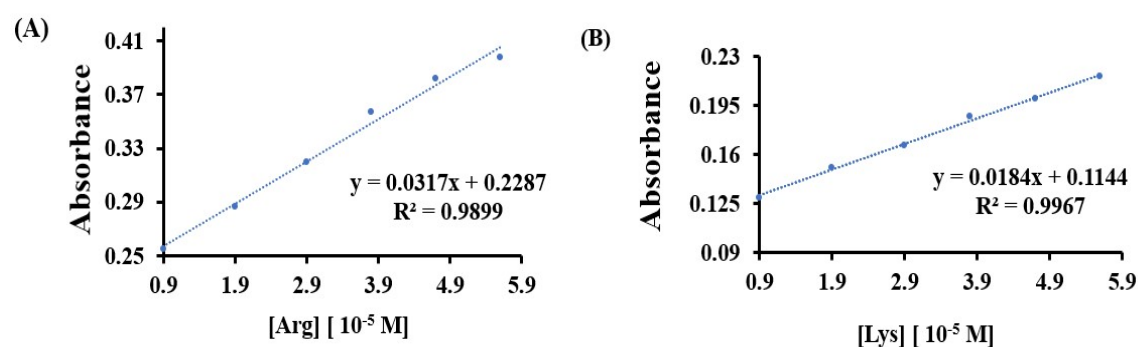

**Figure S7:** Detection Limit plot of BTAN for (A) arginine at 530 nm (B) lysine at 567 nm in DMSO-H<sub>2</sub>O mix solvent

### Determination of limit of quantification (LOQ):

The Limit of Quantification (LOQ) is the concentration level at which quantitative results can be obtained with a specified degree of confidence. Mathematically, the LOQ is defined as 10 times the standard deviation of the results from a series of replicates used to establish a justifiable detection limit. <sup>1</sup>

It can be calculated from the formula  $\text{LOQ} = 10 \sigma / K$ , where  $\sigma$  is the standard deviation of blank measurement, and K is the slope of calibration curve between the absorbance of host vs guest concentration.

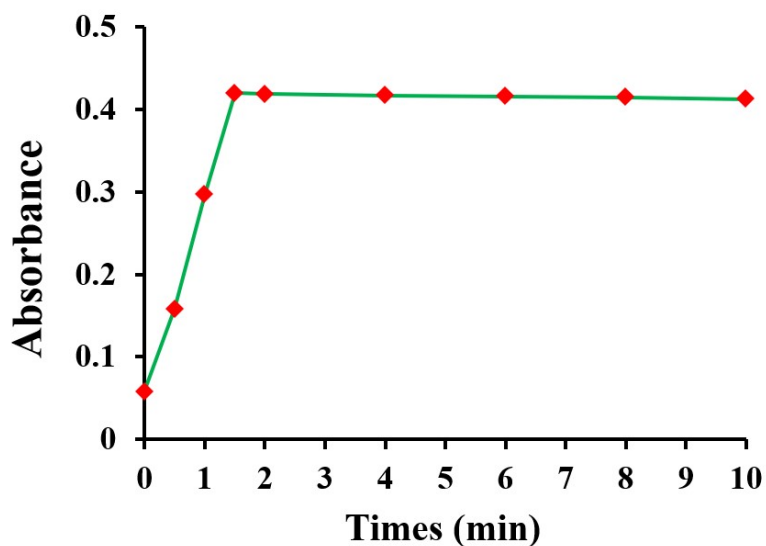

**Figure S8:** Response time of BTAN towards arginine in DMSO-H<sub>2</sub>O, (1:1, v/v) at 564 nm.

**Table S1:** Comparison of different colorimetric and fluorescence probes utilized for the detection of arginine.

| Sensing Probe                                                                       | Medium                                                     | Method                      | LOD( $\mu$ M) | Binding constant ( $M^{-1}$ ) | Ref |
|-------------------------------------------------------------------------------------|------------------------------------------------------------|-----------------------------|---------------|-------------------------------|-----|
| 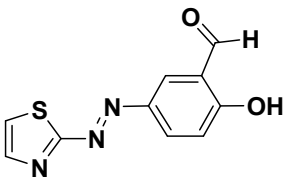 | ACN-H <sub>2</sub> O<br>(8:2 v/v)                          | Colorimetric & Fluorometric | 1.62          | $1.32 \times 10^5$            | [2] |
|  | Na <sub>2</sub> CO <sub>3</sub> -NaHCO <sub>3</sub> buffer | Colorimetric & Fluorometric | 1.39          | NA                            | [3] |
|  | DMSO                                                       | Colorimetric & Fluorometric | 18            | $1.57 \times 10^4$            | [4] |
|  | H <sub>2</sub> O                                           | Fluorometric                | 50            | NA                            | [5] |

|                                                                                     |                                                    |                             |      |                     |      |
|-------------------------------------------------------------------------------------|----------------------------------------------------|-----------------------------|------|---------------------|------|
| 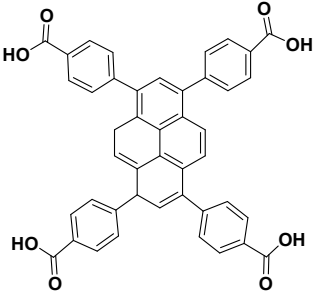   | H <sub>2</sub> O                                   | Fluorometric                | 2.3  | 6.8×10 <sup>5</sup> | [6]  |
|    | DMSO                                               | Fluorometric                | 2.24 | NA                  | [7]  |
|   | H <sub>2</sub> O                                   | Colorimetric & Fluorometric | 1.94 | NA                  | [8]  |
|  | H <sub>2</sub> O                                   | Colorimetric & Fluorometric | 1    | NA                  | [9]  |
|  | THF/H <sub>2</sub> O                               | Colorimetric & Fluorometric | 100  | NA                  | [10] |
|  | DMSO- H <sub>2</sub> O<br>(1:1 v/v)                | Fluorometric                | NA   | NA                  | [11] |
|  | CH <sub>3</sub> CN- H <sub>2</sub> O<br>(9:1, v/v) | Colorimetric & Fluorometric | NA   | NA                  | [12] |

|                                                                                   |                                     |              |     |                      |                      |
|-----------------------------------------------------------------------------------|-------------------------------------|--------------|-----|----------------------|----------------------|
| 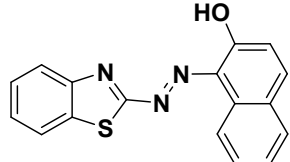 | DMSO- H <sub>2</sub> O<br>(1:1 v/v) | Colorimetric | 0.7 | 0.12×10 <sup>6</sup> | <b>This<br/>work</b> |
|-----------------------------------------------------------------------------------|-------------------------------------|--------------|-----|----------------------|----------------------|

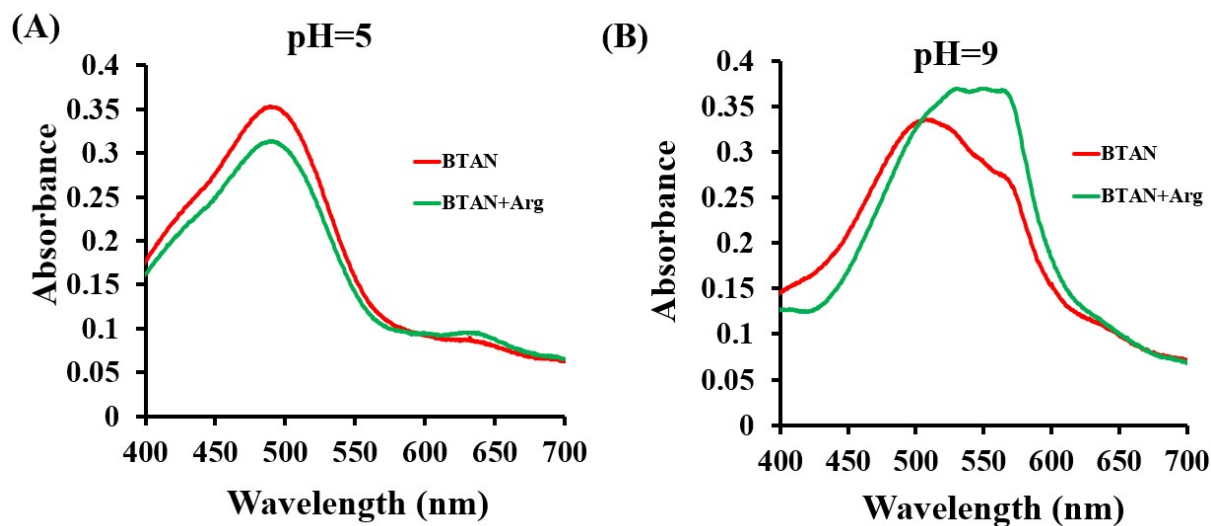

**Figure S9:** The effect of pH on the sensing performance of BTAN upon Arginine addition (A) pH=5 (B) pH=9

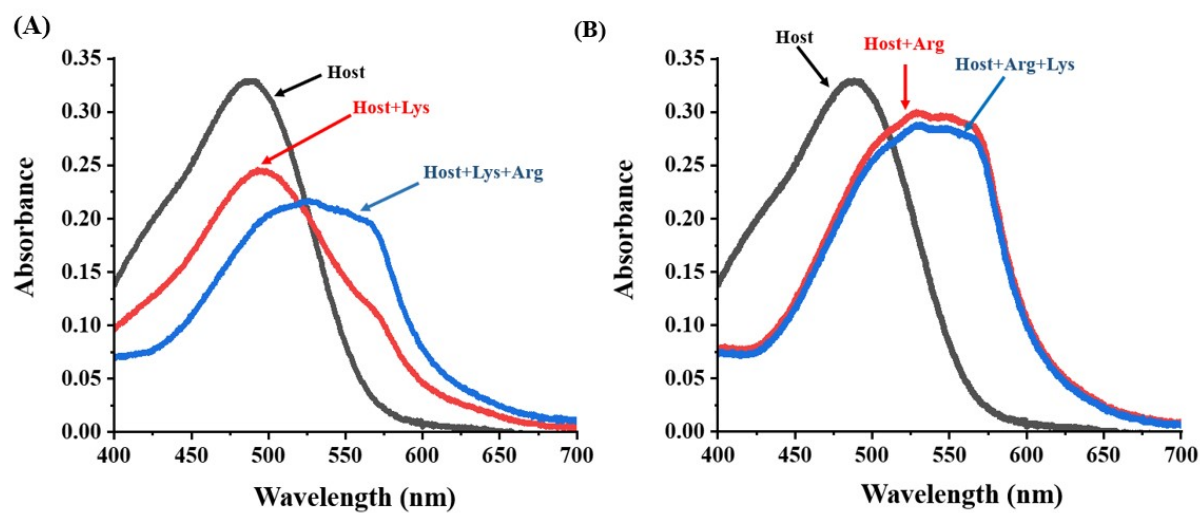

**Figure S10:** Competitive experiment of BTAN; (A) Arginine in the presence of Lysine  
(B) Lysine in the presence of Arginine

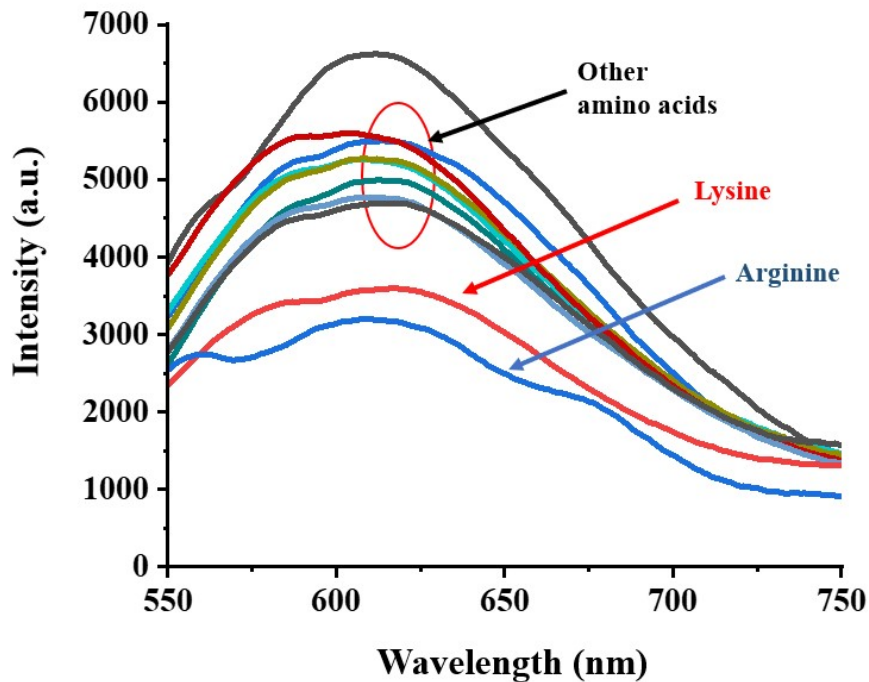

**Figure S11:** Fluorescence emission of BTAN upon addition of different amino acids, when excited at 472 nm.

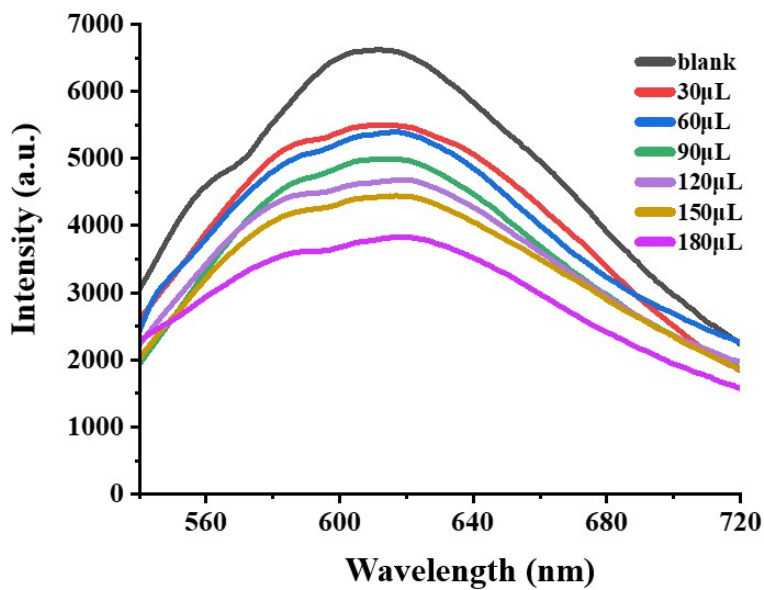

**Figure S12:** Overlaid emission spectra of BTAN ( $10^{-5}$  M) with lysine ( $10^{-4}$  M) in DMSO- $H_2O$ , (1:1, v/v).

**Table S2:** RGB content of probe alone, on Arg addition and followed by TBAS addition.



| Sample            | Red | Green | Blue |
|-------------------|-----|-------|------|
| BTAN              | 252 | 64    | 23   |
| BTAN + Arg        | 181 | 49    | 113  |
| BTAN + Arg + TBAS | 224 | 60    | 39   |

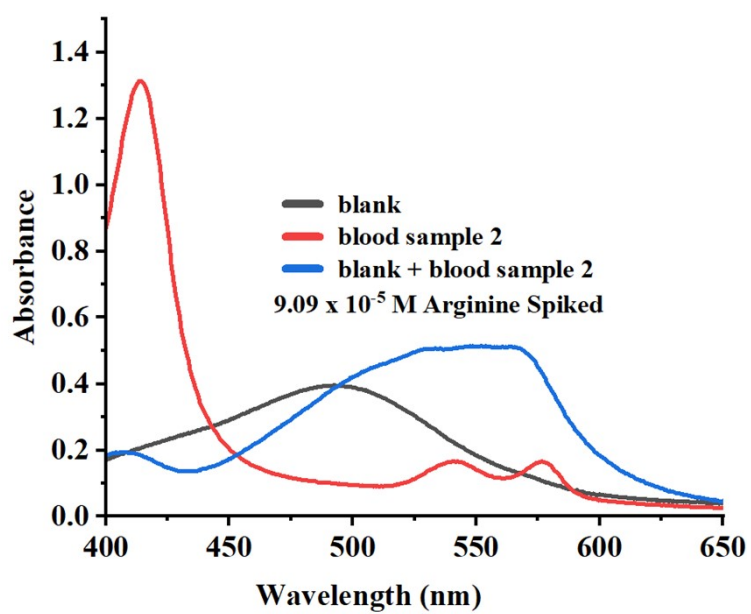

**Figure S13:** Absorption spectra of BTAN with  $9.09 \times 10^{-5}$  M arginine spiked blood sample

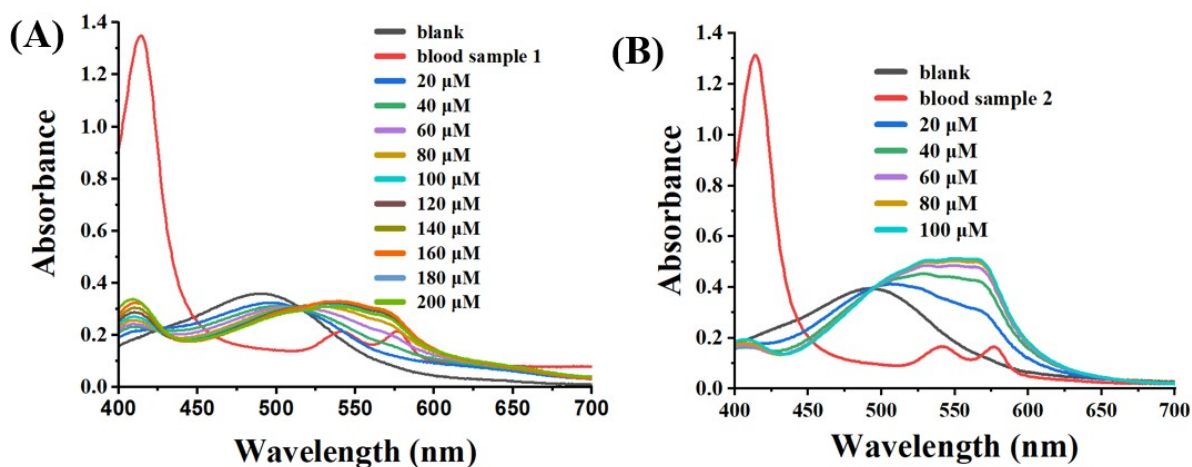

**Figure S14:** Absorption spectra of BTAN upon aliquot addition of spiked blood samples, (A)  $2.7 \times 10^{-5}$  M arginine spiked and (B)  $9.09 \times 10^{-5}$  M arginine blood sample.

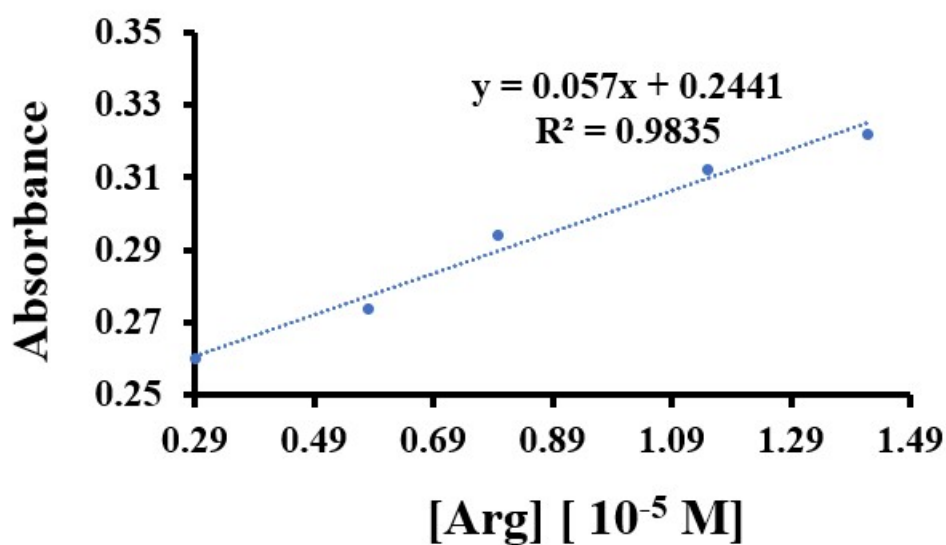

**Figure S15:** LOD plot of sensor BTAN upon aliquot addition of  $2.7 \times 10^{-5}$  M arginine spiked blood sample.

#### References:

1. M. Taleuzzaman, *O. M. C. I. J.*, 2018, 7, OMCIJ.MS.ID.555722.
2. A. Mohammadi, S. Khoshroor and B. Khalili, *J. Photochem. Photobiol. A Chem.*, 2019, 384, 112035.

3. L. Yang, Y. Xie, Q. Chen, J. Zhang, L. Li and H. Sun, *ACS Appl. Bio Mater.*, 2021, **4**, 6558–6564.
4. R. Bawa, N. Deswal, S. Negi, M. Dalela, A. Kumar and R. Kumar, *RSC Adv.*, 2022, **12**, 11942–11952.
5. A. M. Pettiwala and P. K. Singh, *ACS Omega*, 2017, **2**, 8779–8787.
6. J. Hao, M. Wang, S. Wang, Y. Huang and D. Cao, *Dyes and Pigments*, 2020, **175**, 108131.
7. S. Zhang, D. Wu, X. Jiang, F. Xie, X. Jia, X. Song and Y. Yuan, *Sens. Actuators B Chem.*, 2019, **290**, 691–697.
8. R. S. Bhosale, G. V. Shitre, R. Kumar, D. O. Biradar, S. V. Bhosale, R. Narayan and S. V. Bhosale, *Sens. Actuators B Chem.*, 2017, **241**, 1270–1275.
9. S. D. Shahida Parveen, A. Affrose and K. Pitchumani, *Sens. Actuators B Chem.*, 2015, **221**, 521–527.
10. J. Tong, Y. Wang, J. Mei, J. Wang, A. Qin, J. Z. Sun and B. Z. Tang, *Chem. Eur. J.*, 2014, **20**, 4661–4670.
11. X. Shang, J. Li, K. Guo, T. Ti, T. Wang and J. Zhang, *J. Mol. Struct.*, 2017, **1134**, 369–373.
12. H. Li, X. Sun, T. Zheng, Z. Xu, Y. Song and X. Gu, *Sens. Actuators B Chem.*, 2019, **279**, 400–409.
